# Supplementary material for: Efficient work-function engineering of solution-processed MoS2 thin-films for novel hole and electron transport layers leading to high-performance polymer solar cells
Source: Royal Society of Chemistry journal article supplement (doi:10.1039/c3tc30504j), 2013-01-01
Supplement: c3tc30504j.pdf [file c3tc30504j.pdf]

## Electronic Supplementary Information

### Efficient work-function engineering of solution-processed MoS<sub>2</sub> thin-films for novel hole and electron transport layers leading to high-performance polymer solar cells

Jin-Mun Yun,<sup>a</sup> Yong-Jin Noh,<sup>b</sup> Jun-Seok Yeo,<sup>a</sup> Yeong-Jin Go,<sup>b</sup> Seok-In Na,<sup>\*b</sup> Hyung-Gu Jeong,<sup>a</sup> Juhwan Kim,<sup>a</sup> Sehyun Lee,<sup>a</sup> Seok-Soon Kim,<sup>c</sup> Hye Young Koo,<sup>d</sup> Tae-Wook Kim,<sup>d</sup> and Dong-Yu Kim,<sup>\*a</sup>

#### Experimental section

##### Preparation of MoS<sub>2</sub> nanosheets

All chemicals were purchased from Sigma-Aldrich and used without further purification. MoS<sub>2</sub> nanosheets were prepared by a slightly modified method published elsewhere.<sup>1</sup> Typically, natural MoS<sub>2</sub> powder (0.3 g) was immersed into 2.0 M n-buthyl lithium in a cyclohexane solution (4 mL) for 2 days under an inert atmosphere. The resultant Li<sub>x</sub>MoS<sub>2</sub> was thoroughly washed with anhydrous hexane in order to remove un-intercalated n-buthyl lithium and organic residues. And then, Li<sub>x</sub>MoS<sub>2</sub> powder was exfoliated by ultrasonication in distilled water for 1 h. Next, a small amount of LiCl was added into the resultant dispersion in order to precipitate MoS<sub>2</sub> nanosheets, which were centrifuged and washed with DI water several times to completely remove the lithium compounds. The resultant MoS<sub>2</sub> dispersion was stored under ambient temperature for 2 days. Finally, the produced MoS<sub>2</sub> was filtered and re-dispersed in DMF at a concentration of ~1 mgml<sup>-1</sup> and used for sample characterization and device fabrication.

##### Preparation of p- and n-doping solution

As a p-type dopant, gold chloride trihydrate (HAuCl<sub>4</sub>·3H<sub>2</sub>O) was dissolved into methanol at concentrations of 20, 10, and 1 mM through brief bath-sonication. For the n-type dopant, 0.1, 0.01, and 0.006 M of sodium borohydride (NaBH<sub>4</sub>) solutions were prepared by addition into dimethylformamide (DMF): water mixture (9.5:0.5 v/v), and the resultant solution was briefly sonicated until the solution was clear.

##### Fabrication of n-PSCs

ITO-coated glass substrates were sequentially cleaned in an ultrasonic bath with detergent, acetone, deionized water, and isopropyl alcohol each for 10 min, and then dried in an oven at 100 °C for 30 min. All substrates were then treated with UV/O<sub>3</sub> for 30 min. To fabricate the MoS<sub>2</sub>-based HTL, MoS<sub>2</sub> dispersed in DMF was spin-coated onto UV/O<sub>3</sub>-treated ITO substrates at 3,000 rpm for 30 s in air, and subsequently annealed at 150 or 250 °C for 30 min in N<sub>2</sub>-filled glove box. To dope the MoS<sub>2</sub> film with HAuCl<sub>4</sub>, each doping solution (20, 10, and 1 mM HAuCl<sub>4</sub>) was spin-casted onto 150 °C-annealed MoS<sub>2</sub> film at a rate of 3,000 rpm for 30 s in air, and subsequently dried for 15 min under an N<sub>2</sub> atmosphere. The *o*-dichlorobenzene (*o*-DCB) solution containing a 25 mgml<sup>-1</sup> of P3HT (Rieke Metals) and a 25 mgml<sup>-1</sup> of PCBM (Nano-C) was spin-coated onto the hole

extraction layer-coated substrate at 700 rpm for 60 s, and then the resultant active-coated substrate was kept in a glass jar at room temperature to allow the *o*-DCB solvent to evaporate slowly for 2 h in an N<sub>2</sub>-filled glove box, followed by annealing at 120 °C for 15 min inside the glove box. Finally, top electrodes composed of Ca (20 nm)/Al (100 nm) with an area of 4.64 mm<sup>2</sup> were deposited using a thermal evaporator in vacuum with a pressure of 10<sup>-6</sup> Torr.

### **Fabrication of i-PSCs**

MoS<sub>2</sub>-based ETLs were prepared by doping the MoS<sub>2</sub> film with NaBH<sub>4</sub>, each doping solution (0.1, 0.01, and 0.006 M NaBH<sub>4</sub>) was spin-casted onto 150 °C-annealed MoS<sub>2</sub> film at a rate of 3,000 rpm for 30 s in air, and subsequently dried for 15 min under an N<sub>2</sub> atmosphere. To construct a HTL, the PEDOT:PSS:iso-propyl alcohol solution (1:6 v/v) was spin-casted onto the prepared photoactive layer at 3,000 rpm for 30 s in air. Next, the resultant device was annealed at 120 °C for 10 min in an N<sub>2</sub>-filled glove box. Note that preparation and fabrication procedures of the photoactive layer were the same as those described for inverted-structure PSCs. Finally, the top electrode composed of Ag (100 nm) with an area of 4.64 mm<sup>2</sup> was deposited using a thermal evaporator in vacuum with a pressure of 10<sup>-6</sup> Torr.

### **Device characterization**

Photovoltaic characteristics were measured using a Keithley 1200 instrument under 100 mWcm<sup>-2</sup> with AM 1.5 G. A reference Si solar cell certified by the International System of Units (SI) (SRC-1000-TC-KG5-N, VLSI Standards, Inc) was used to calibrate an accurate measurement.

### **Sample characterizations**

UV-vis/NIR spectra were obtained using a Jasco V-570 UV-vis/NIR spectrophotometer. XPS were measured using an AXIS-NOVA (Kratos) system with a monochromatized Al K $\alpha$  under a pressure of 5  $\times$  10<sup>-8</sup> Torr. AFM images were obtained with a Veeco Dimension 3100 instrument with a silicon cantilever operated in tapping mode. UPS measurements were conducted using an AXIS-NOVA (Kratos) system with He I under a base pressure of 5  $\times$  10<sup>-8</sup> Torr. Sheet resistance of the MoS<sub>2</sub> thin-film was measured with a 4-point probe (FPP-RS8, Dasol Eng.).

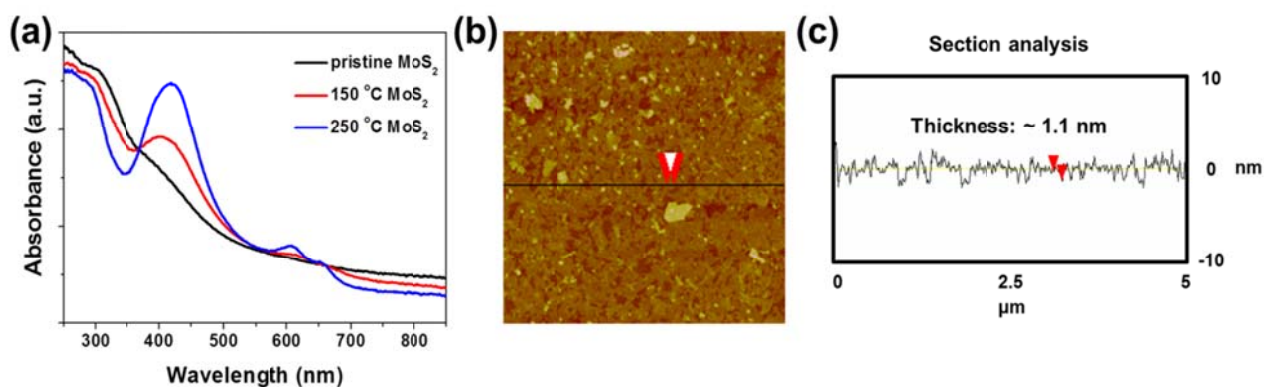

**Fig. S1** (a) UV-vis spectra of pristine and annealed MoS<sub>2</sub> thin-films coated onto glass substrates. With increasing annealing temperature, structural transformation occurred from the metallic 1T- to the semiconducting 2H-MoS<sub>2</sub> phase, which is consistent with a previous report.<sup>2</sup> (b) The AFM image and (c) section analysis of MoS<sub>2</sub> sheets casted onto a glass substrate. The z-range and scan size are 20 nm and 5 μm, respectively.

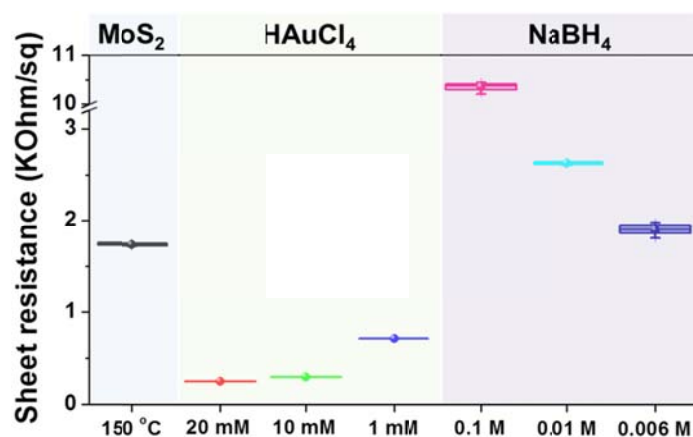

**Fig. S2** (a) Sheet resistance values of MoS<sub>2</sub> films before and after doping treatments.

Compared with the 150 °C-annealed un-doped MoS<sub>2</sub> film, the sheet resistance values of the p-doped MoS<sub>2</sub> films were all reduced due to the following reasons: (a) Cl ions chemisorbed onto MoS<sub>2</sub> sheets decrease the sheet resistance due to the fact that Cl ions having the strong electronegativity extract electrons directly from the MoS<sub>2</sub>. (b) Electrons were extracted from MoS<sub>2</sub> sheets due to the reduction of Au<sup>3+</sup> to Au<sup>0</sup> so that p-type doping was occurred and the hole carriers concentration was increased. From the above two reasons, the sheet resistance of HAuCl<sub>4</sub>-treated MoS<sub>2</sub> film was decreased.

By contrast, the sheet resistance of n-doped MoS<sub>2</sub> films was all higher than that of 150 °C-annealed un-doped MoS<sub>2</sub> film. In general, MoS<sub>2</sub> prepared using the Li-intercalation/exfoliation method is reported to be a p-type material. Therefore, the n-doping treatment was considered to have decreased carrier concentration, thus resulting in an increased sheet resistance of the MoS<sub>2</sub> film.<sup>3</sup>

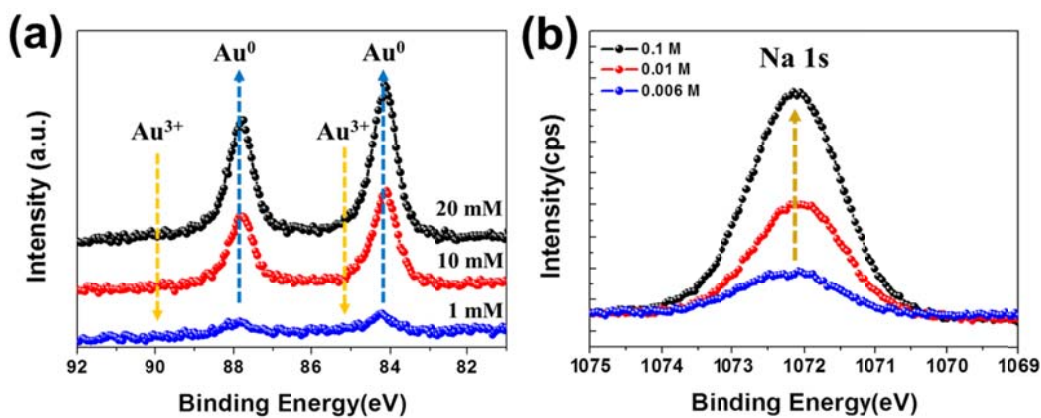

**Fig. S3** XPS spectra of (a) Au 4f and (b) Na 1s peaks for MoS<sub>2</sub> thin-films doped with different HAuCl<sub>4</sub> and NaBH<sub>4</sub> concentrations, respectively.

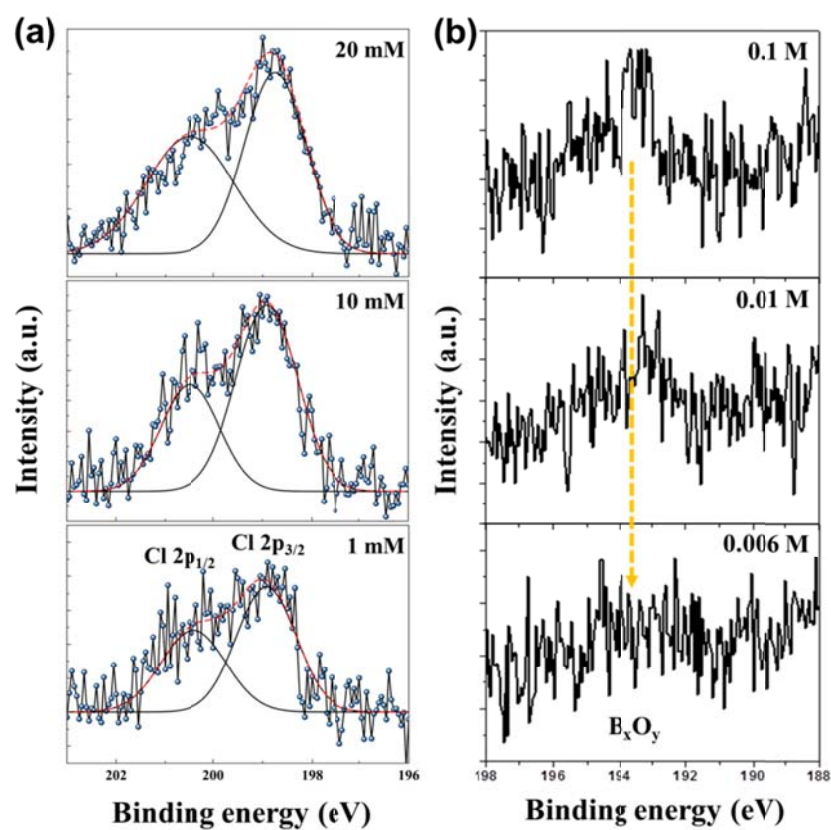

**Fig. S4** XPS spectra showing (a) Cl and (b) B<sub>x</sub>O<sub>y</sub> peak regions for MoS<sub>2</sub> thin-films doped with various HAuCl<sub>4</sub> and NaBH<sub>4</sub> concentrations, respectively.

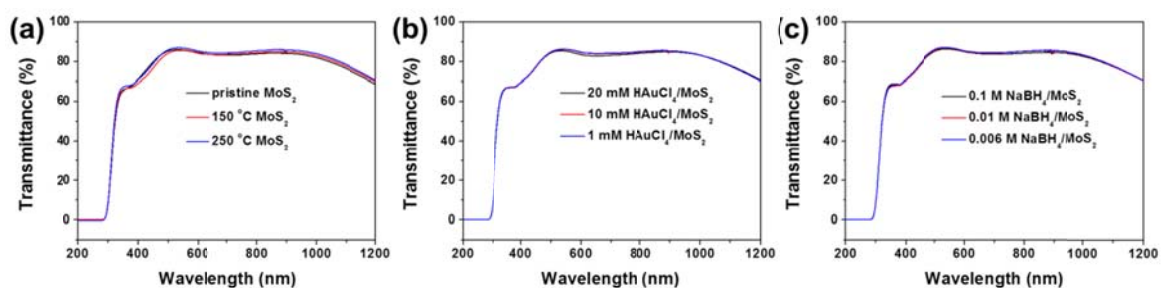

**Fig. S5** Transmittance spectra of (a) un-, (b) p-, and (c) n-doped MoS<sub>2</sub>-based interfacial layers coated onto ITO/glass substrates. The transmittance spectra of un-, p-, and n-doped MoS<sub>2</sub> thin-films showed similar transmittance values ranging from 85–87%, indicating that the transmittance values of MoS<sub>2</sub>-based interfacial layers had little influence on the J<sub>sc</sub> values in J-V curves.

**Table S1** Work-function values of un-, p-, and n-doped MoS<sub>2</sub> thin-films

|                           | Binding energy (eV) | Work-function (eV) |
|---------------------------|---------------------|--------------------|
| Pristine MoS <sub>2</sub> | 16.84               | 4.36               |
| 150 °C MoS <sub>2</sub>   | 16.68               | 4.52               |
| 250 °C MoS <sub>2</sub>   | 16.68               | 4.52               |
| 20 mM HAuCl <sub>4</sub>  | 16.44               | 4.76               |
| 10 mM HAuCl <sub>4</sub>  | 16.50               | 4.70               |
| 1 mM HAuCl <sub>4</sub>   | 16.56               | 4.64               |
| 0.1 M NaBH <sub>4</sub>   | 17.75               | 3.45               |
| 0.01 M NaBH <sub>4</sub>  | 17.23               | 3.97               |
| 0.006 M NaBH <sub>4</sub> | 16.77               | 4.43               |

**Table S2** Summary of rms roughness values for different MoS<sub>2</sub>-based interfacial layers

| sample                            | un-doped MoS <sub>2</sub> |        |        | p-doped MoS <sub>2</sub> |       |      |       | n-doped MoS <sub>2</sub> |         |
|-----------------------------------|---------------------------|--------|--------|--------------------------|-------|------|-------|--------------------------|---------|
| condition                         | pristine                  | 150 °C | 250 °C | 20 mM                    | 10 mM | 1 mM | 0.1 M | 0.01 M                   | 0.006 M |
| rms roughness (nm) <sup>(a)</sup> | 1.18                      | 1.16   | 1.17   | 2.27                     | 1.38  | 1.22 | 2.63  | 1.14                     | 1.17    |

<sup>(a)</sup>The rms roughness values were calculated from the AFM data shown in Fig. 3.

**Table S3** Summary of peak positions of the XPS Mo 3d<sub>3/2</sub> and Mo 3d<sub>5/2</sub>

| Sample                    | Mo 3d <sub>3/2</sub> (eV) | Mo 3d <sub>5/2</sub> (eV) |
|---------------------------|---------------------------|---------------------------|
| 150 °C MoS <sub>2</sub>   | 232.55                    | 229.45                    |
| 20 mM HAuCl <sub>4</sub>  | 232.40                    | 229.15                    |
| 10 mM HAuCl <sub>4</sub>  | 232.40                    | 229.25                    |
| 1 mM HAuCl <sub>4</sub>   | 232.45                    | 229.30                    |
| 0.1 M NaBH <sub>4</sub>   | 233.15                    | 229.90                    |
| 0.01 M NaBH <sub>4</sub>  | 232.95                    | 229.65                    |
| 0.006 M NaBH <sub>4</sub> | 232.70                    | 229.50                    |

## References

- 1 W. M. R. Divigalpitiya, S. R. Morrison, R. F. Frindt, *Thin Solid Films* 1990, **186**, 177.
- 2 G. Eda, H. Yamaguchi, D. Voiry, T. Fujita, M. Chen, M. Chhowalla, *Nano Lett.* 2011, **11**, 5111.
- 3 K. C. Kwon, K. S. Choi, B. J. Kim, J.-L. Lee, S. Y. Kim, *J. Phys. Chem. C* 2012, **116**, 26586.
